# Supplementary material for: Human CD141+ Dendritic Cell and CD1c+ Dendritic Cell Undergo Concordant Early Genetic Programming after Activation in Humanized Mice In Vivo
Source: PubMed Central journal article supplement (PMC5670352; doi:10.3389/fimmu.2017.01419), 2017-10-30
Supplement: presentation_1.pdf [file presentation_1.pdf]

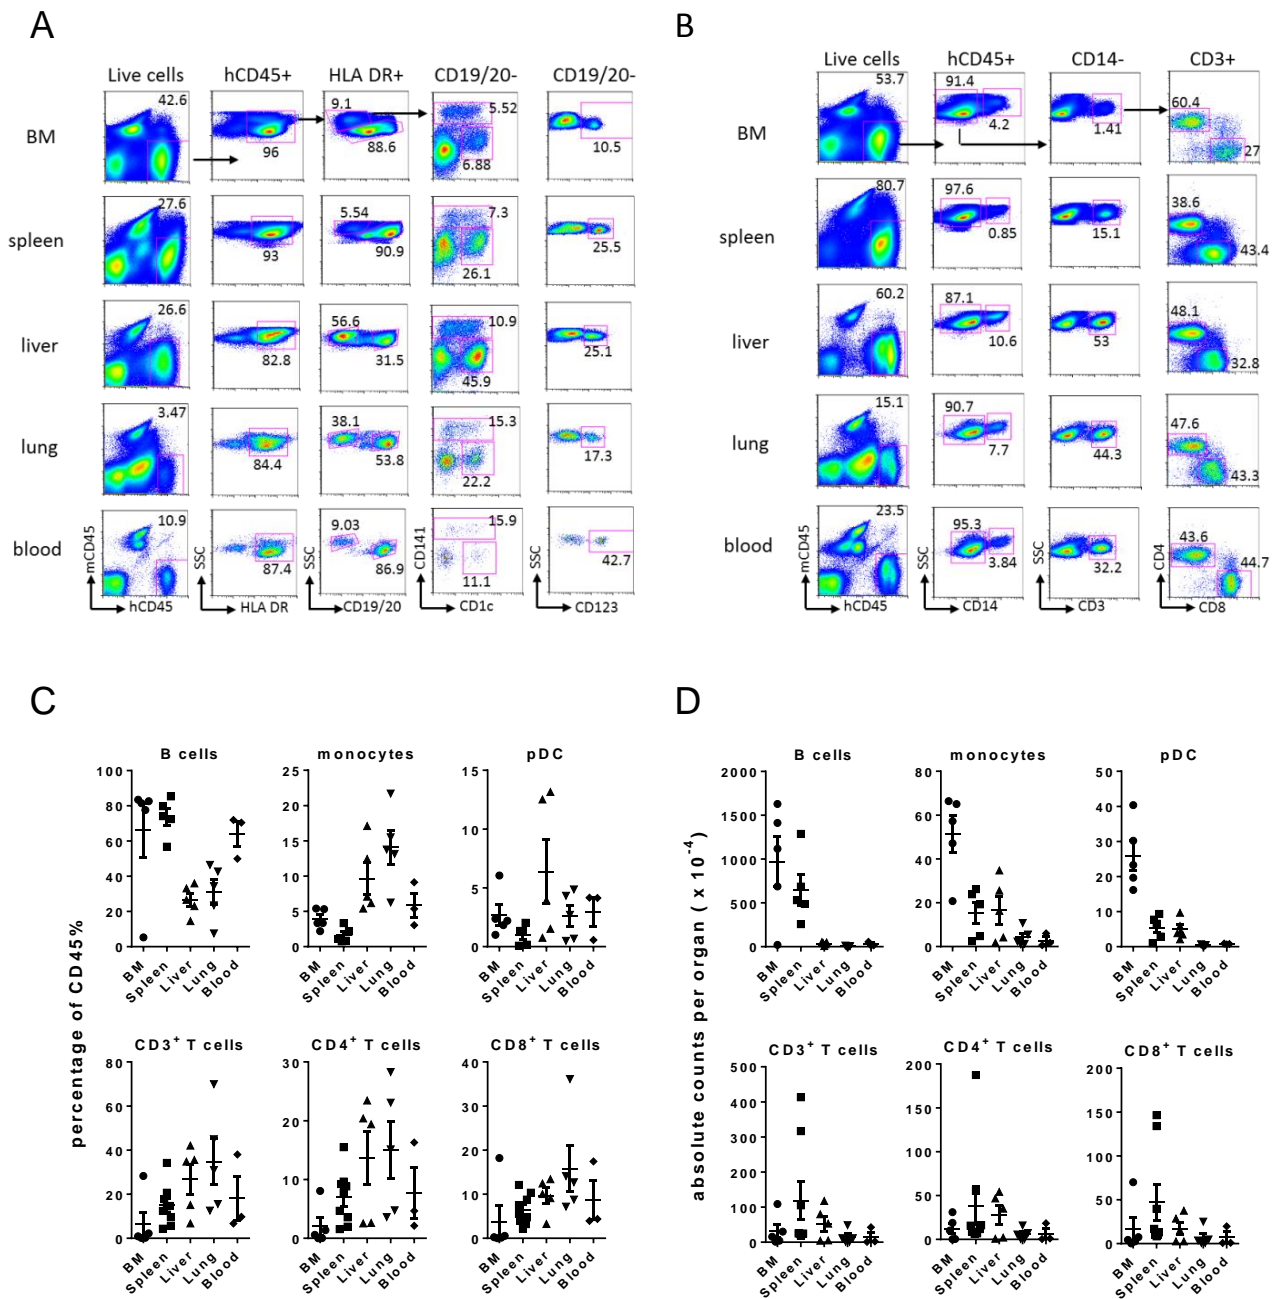

**Figure S1.** NSG-A2 mice support robust multi-lineage differentiation of human CD34<sup>+</sup> HSC in lymphoid and nonlymphoid organs. **A, B.** Live singlet cells were first gated on forward scatter and side scatter parameters followed by exclusion of live/dead<sup>+</sup> events (not shown). **A.** Gating strategy for B cells (huCD45<sup>+</sup> HLA-DR<sup>+</sup>CD19/20<sup>+</sup>), CD141<sup>+</sup> DC (huCD45<sup>+</sup> HLA-DR<sup>+</sup>CD19/20<sup>-</sup>CD141<sup>+</sup>), CD1c<sup>+</sup> DC (huCD45<sup>+</sup> HLA-DR<sup>+</sup>CD19/20<sup>-</sup>CD1c<sup>+</sup>), and plasmacytoid DC (huCD45<sup>+</sup> HLA-DR<sup>+</sup>CD19/20<sup>-</sup>CD123<sup>+</sup>). **B.** Gating strategy for monocytes (huCD45<sup>+</sup> CD14<sup>+</sup>), CD4<sup>+</sup> T cells (huCD45<sup>+</sup> CD14<sup>-</sup>CD3<sup>+</sup>CD4<sup>+</sup>) and CD8<sup>+</sup> T cells (huCD45<sup>+</sup> CD14<sup>-</sup>CD3<sup>+</sup>CD8<sup>+</sup>). **C, D.** Frequency of leukocyte subsets expressed as **C.** absolute cell counts per organ (single tibia and femur for bone marrow (BM) and per ml for blood) and **D.** as % of huCD45<sup>+</sup> leukocytes. Each point represents an individual hu mouse.

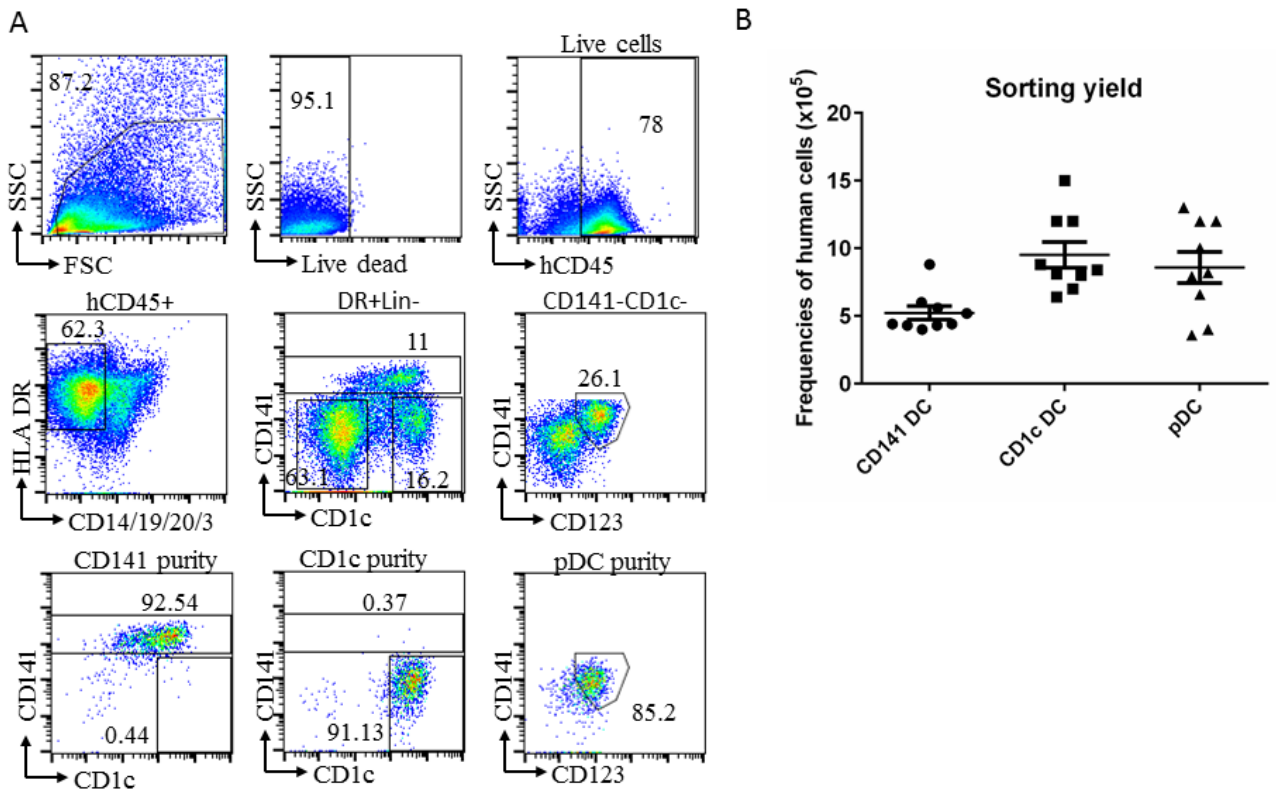

**Figure S2:** Sorting strategy for DC subsets and sorting yields. BM was isolated from FLT3-L injected humanised mice. DC subsets were sorted from lineage (mCD45, CD34, CD3, CD14, CD19, CD20) depleted BM. **A.** Dead cells were excluded by staining with Live Dead Aqua. DC were gated as hCD45+HLA DR+Lin- (CD3, CD14, CD19, and CD20) cells. DC subsets were sorted based on expression of CD141, CD1c and CD123. **B.** Sorting yield for each DC subsets.

PCA: Blood + BoneMarrow except pDC

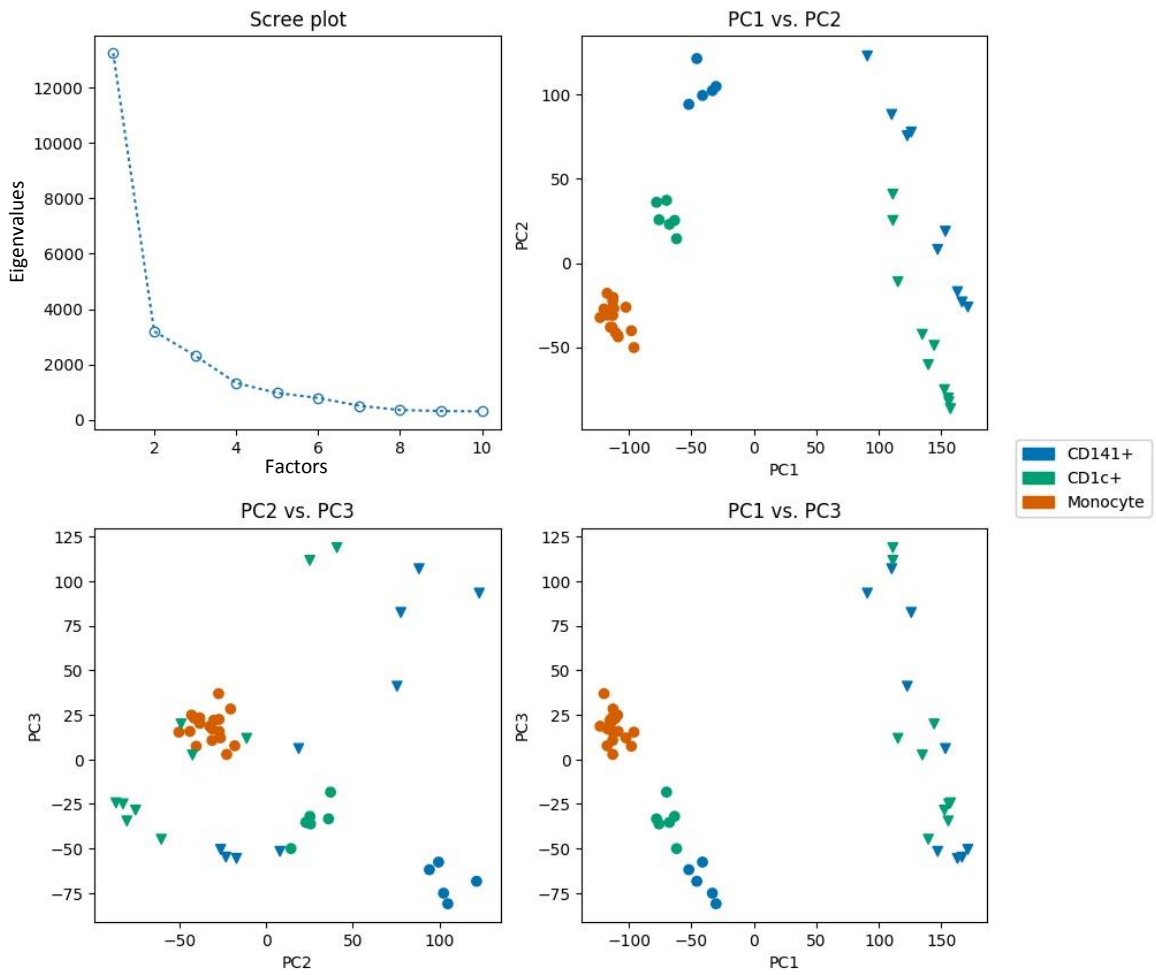

**Figure S3:** PCA analysis of CD1c v CD141 in hu mouse and blood. Triangles are hu mouse DC and circles are human blood DC and monocytes.

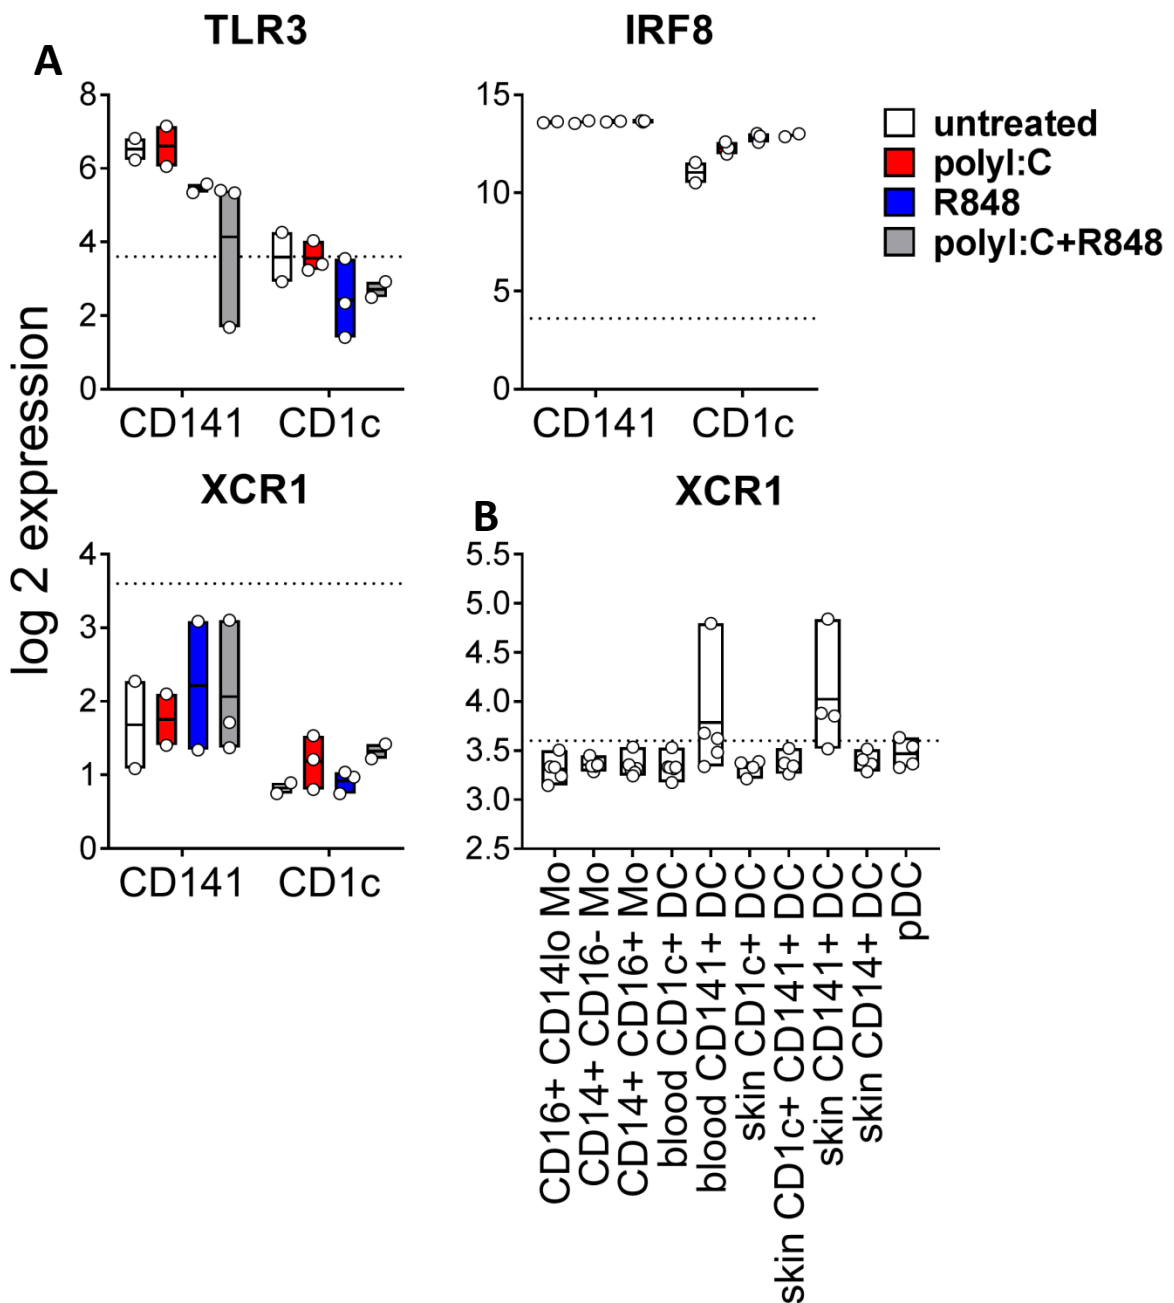

**Figure S4:** **A.** Expression of CD141<sup>+</sup> DC associated genes TLR3, IRF8 and XCR1 that fell outside the strict log-3 fold change (adjusted  $p < 0.01$ ) statistical threshold set for differential expression by humanised mouse DC. **B.** XCR1 expression by blood DC and monocyte subsets (data obtained from GSE35457 ([Haniffa et al. 2012](#))).

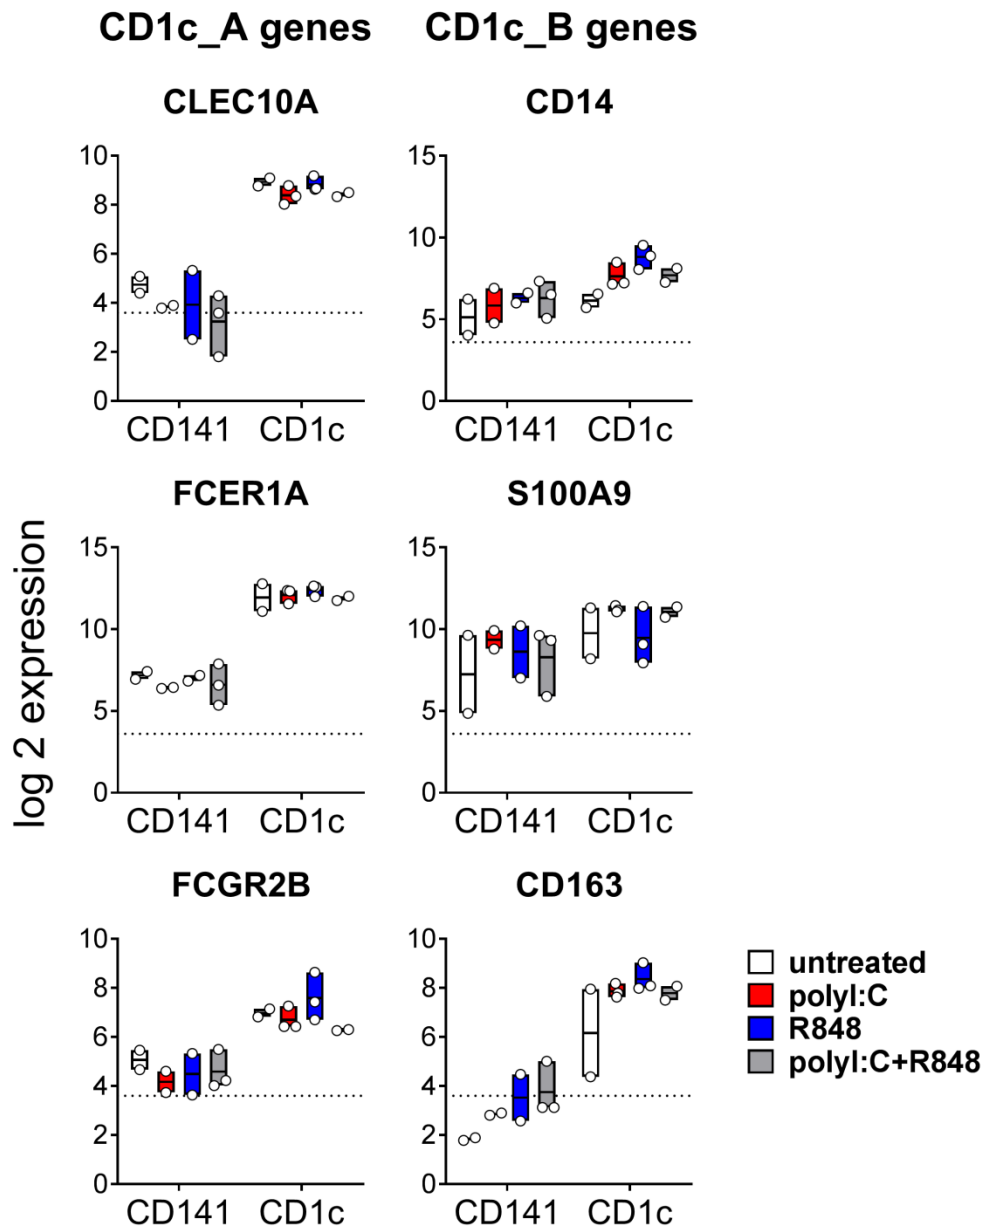

**Figure S5:** Expression of genes associated with distinct CD1c<sup>+</sup> DC subsets, non-inflammatory CD1c<sub>A</sub> and inflammatory CD1c<sub>B</sub>.

CD1c + Monocyte against all others.  
LFC > 3, adj.p.value < 0.01

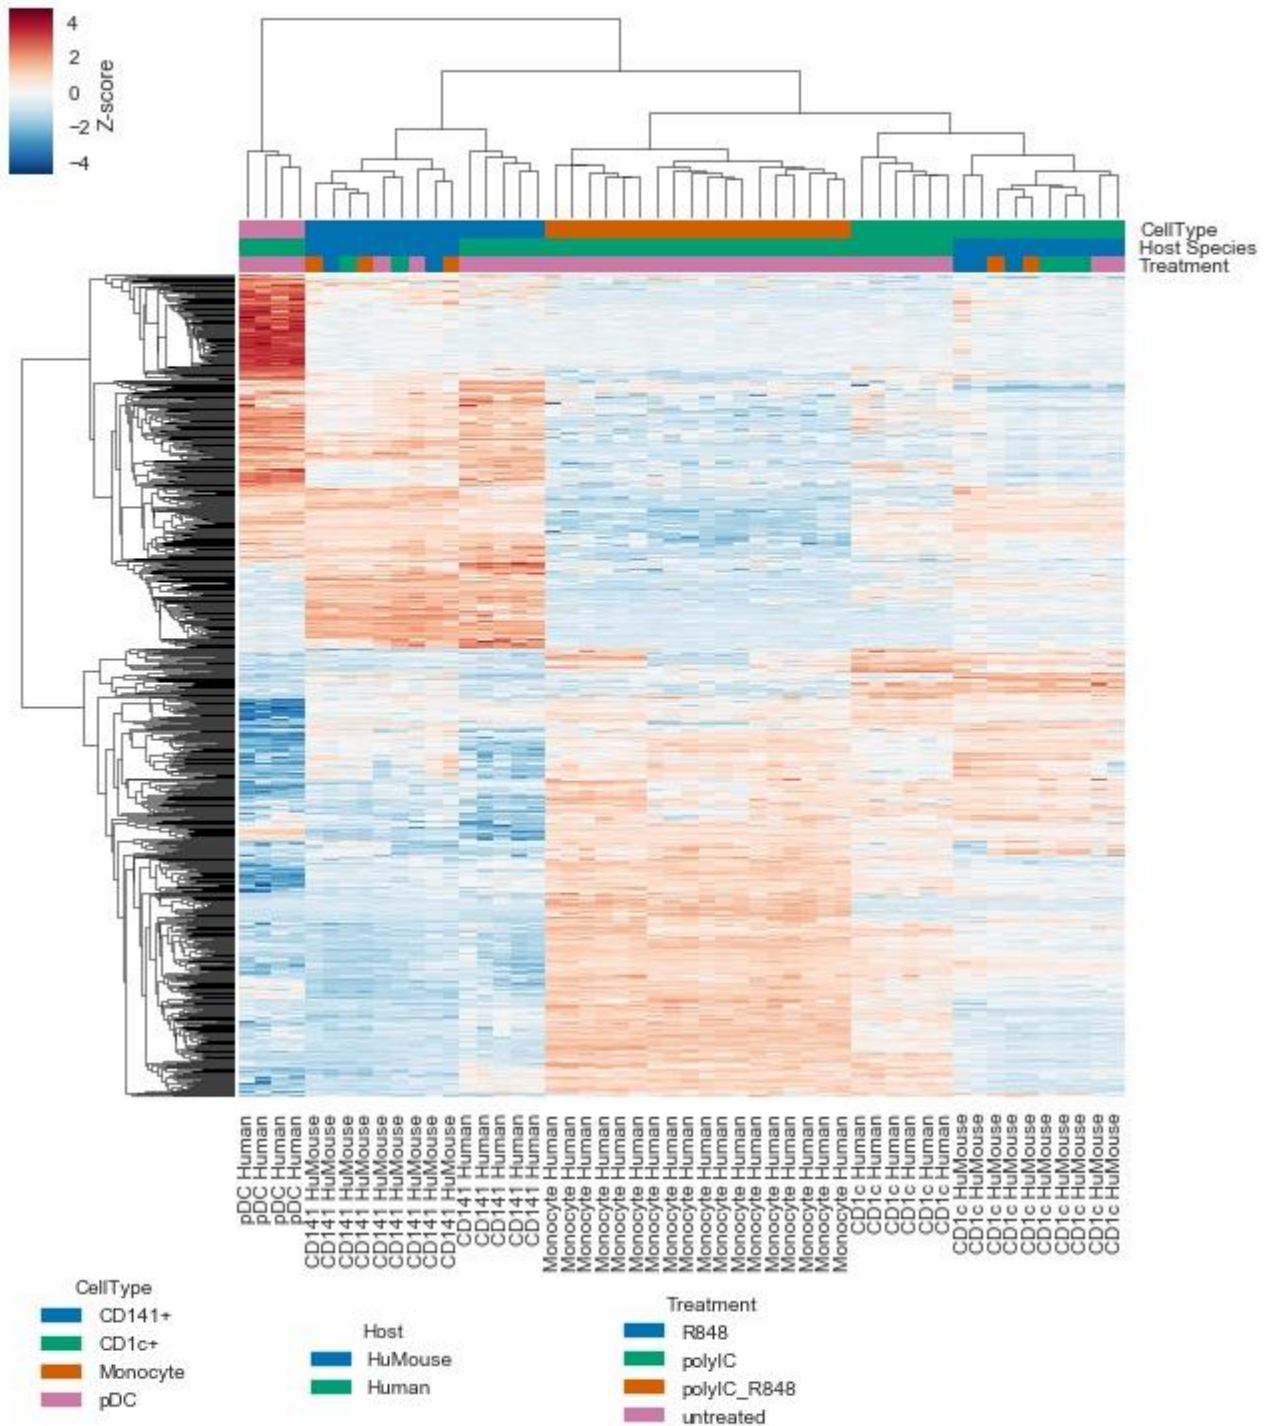

**Figure S6:** Heatmap showing genes differentially expressed by blood monocytes, CD1c<sup>+</sup> DC and humanized mouse CD1c<sup>+</sup> DC compared with other subsets (log-3 fold change, adjusted p.value < 0.01). Sample groups are colored at the bottom of the sample tree by ClustDiff (CD1c<sup>+</sup> green; CD141<sup>+</sup> blue); Host species (Humanised mouse green; human cells blue) and Treatment (R848 alone blue; Poly I:C green; Poly I:C + R848 combination pink; untreated orange). The color of expression scores is scaled by Z-score, per row.
